# Supplementary material
Source: PubMed Central journal article supplement (PMC3994403)
Supplement: NIHMS569836-supplement-1.pdf [file NIHMS569836-supplement-1.pdf]

**A**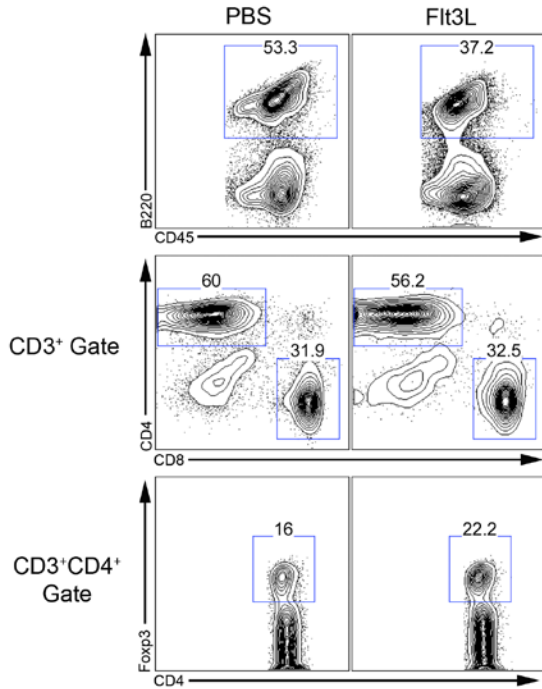**B**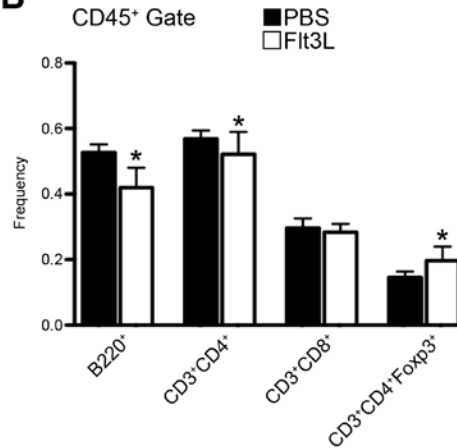**C**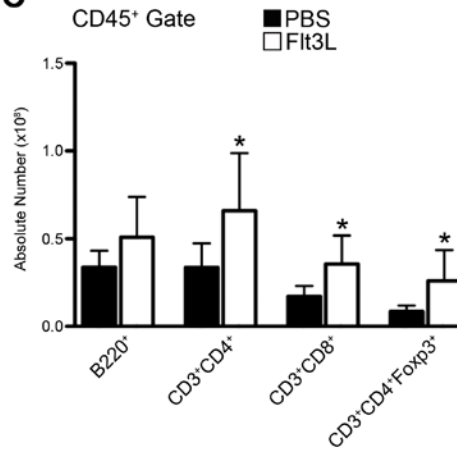

**SUPPLEMENTAL FIGURE 1.** Flt3L reduces the frequency of splenic B cells and pan CD4<sup>+</sup> T cells, while Foxp3<sup>+</sup> Treg frequency is increased. **A**, CD45<sup>+</sup>-gated BALB/c splenocytes were analyzed for the frequency of lymphoid cell subsets, including B cells (B220<sup>+</sup>), CD4<sup>+</sup> T cells (CD3<sup>+</sup>CD4<sup>+</sup>), CD8<sup>+</sup> T cells (CD3<sup>+</sup>CD8<sup>+</sup>), and Treg (CD3<sup>+</sup>CD4<sup>+</sup>Foxp3<sup>+</sup>). **B**, The frequency of lymphoid subsets was determined across multiple experiments and **(C)** absolute numbers quantified. Data are representative of n≥6 mice. \* p<0.05 by two-tailed Student's 't' test.

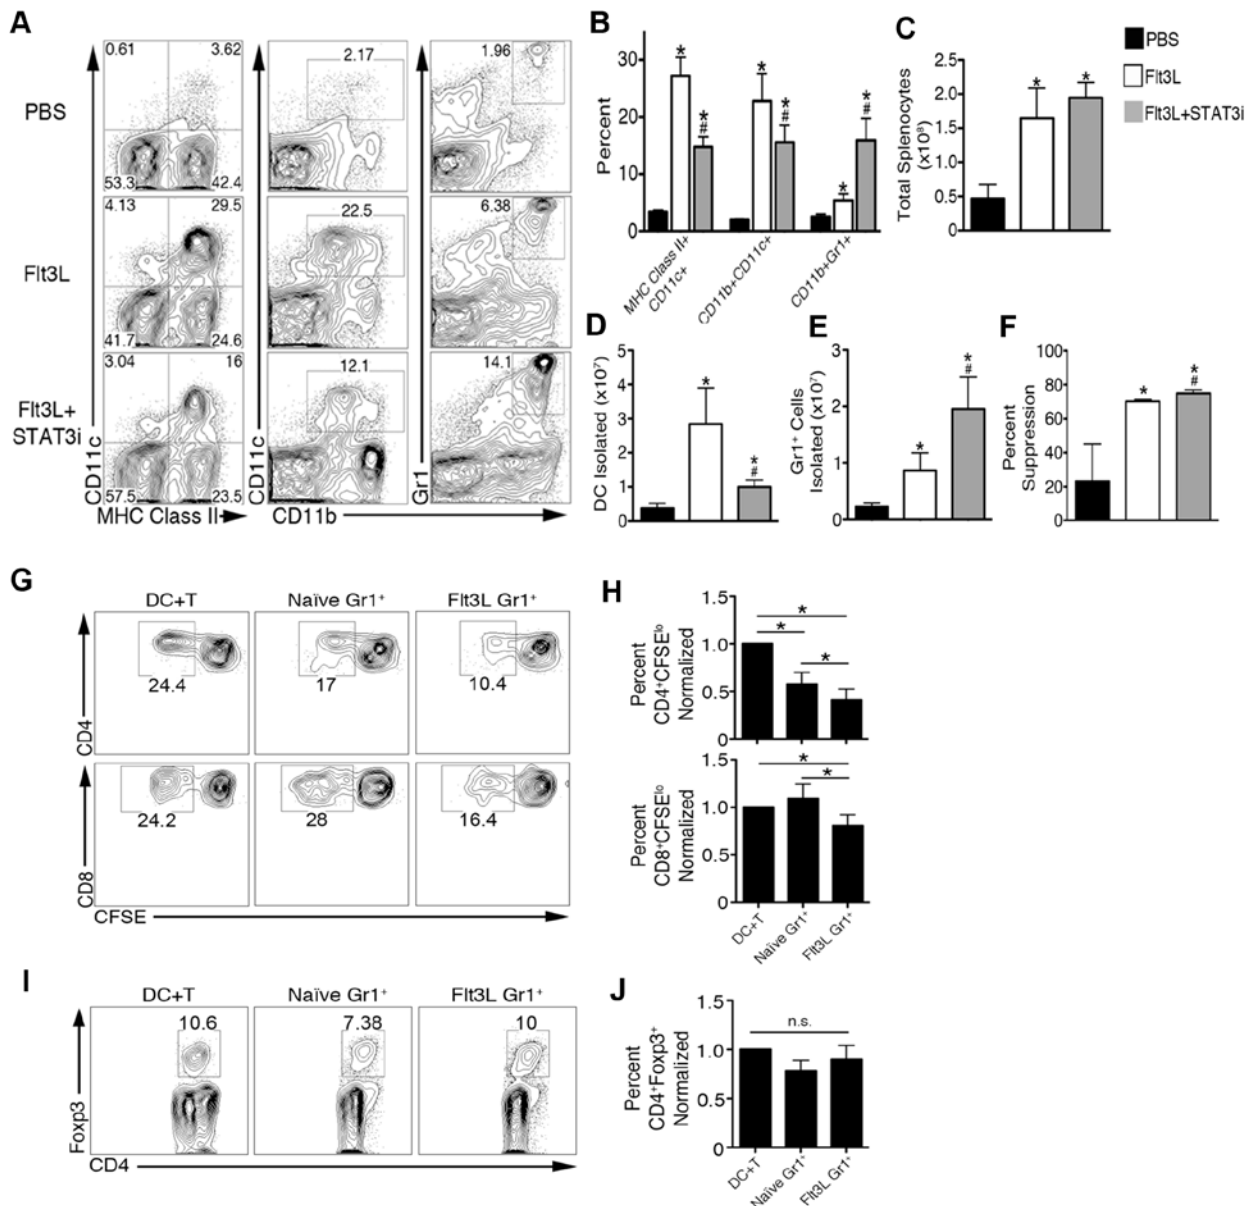

**SUPPLEMENTAL FIGURE 2.** STAT3 inhibition during FIt3L administration reduces DC expansion, but augments expansion of Gr1<sup>+</sup> cells that potently suppress CD4<sup>+</sup> T cells without affecting Treg frequency. **A**, STAT3 inhibitor (STAT3i) was co-administered with FIt3L, and DC and MDSC frequency was determined and (**B**) quantified. **C**, Total viable splenocytes, (**D**) DC, and (**E**) Gr1<sup>+</sup> cells were isolated and enumerated. (**F**) Isolated BALB/c splenic Gr1<sup>+</sup> cells were used to suppress BALB/c CD3<sup>+</sup> T cells (1x10<sup>5</sup>) stimulated with B6 FIt3L-mobilized CD11c<sup>+</sup> DC (1.25x10<sup>4</sup>). **A-F**, \* and # p<0.05 compared to PBS and FIt3L groups, respectively. **G**, MLR co-cultures were performed as described in Fig. 2E with CFSE-labeled CD3<sup>+</sup> T cell responders. Activated CD4<sup>+</sup> and CD8<sup>+</sup> T cell proliferation was determined by CFSE dilution on d3 and (**G-J**) quantified. **I-J**, The frequency of CD4<sup>+</sup>Foxp3<sup>+</sup> T cells was also determined on d5 of co-culture. \* p<0.05 from n= 2-3 independent experiments with n≥4 mice per group.
